# Supplementary material for: Healthcare Students’ and Educators’ Views on the Integration of Gender-Based Violence Education into the Curriculum: a Qualitative Inquiry in Three Countries
Source: Springer Nature journal article supplement (doi:10.1007/s10896-022-00441-2), 2022-09-23
Supplement: MOESM1 [file 23531328]

## **Online Resource 1**

### *Focus Group Guides (English and Spanish)*

#### **Focus Group Guide (UK and Australia)**

1. Give out participant information sheet, consent form and demographic data collection form
2. Ensure there is clarity about any support needed following the session
3. Introduction
4. What is your experience of learning/teaching about GBV? (Prompt for successes as well as issues, make sure to consider placements and not just direct teaching)
5. What more could be done to improve learning about GBV?
6. When during the curriculum should GBV education take place? (Both “in x year” or “before...” comments are useful)
7. How should GBV be taught?
8. Any other issues?
9. Final word or sentence from everyone about the session in turn, people are allowed to “pass”
10. Facilitator sums up main themes
11. Thank you and give out card

Thank you very much for talking to me!

## **Guía del Grupo Focal (Chile)**

1. Entregue la hoja de información al participante, el formulario de consentimiento y los datos demográficos
2. Asegúrese de que haya claridad sobre el apoyo que puede recibir después de la sesión
3. Introducción
4. ¿Cuál es tu experiencia de aprendizaje / enseñanza y GBV? (Indicador de éxitos y temas, asegúrese de considerar el lugar no solo la enseñanza directa)
5. ¿Qué se podría hacer para mejorar el aprendizaje sobre la violencia de género?
6. ¿En qué semestre del plan de estudios debería tener lugar la educación sobre GBV? (ambos “en x año” o “antes de...” son útiles)
7. ¿Cómo se debe enseñar la GBV?
8. ¿Existe otro problema?
9. Palabra final o frase de todos sobre la sesión, se permite a las personas poder pasar
10. El facilitador resume los temas principales
11. Dar las gracias por participar y da una tarjeta

¡Muchas gracias por hablar conmigo!
